# Supplementary material for: Effect of a single dose of oral azithromycin on malaria parasitaemia in children: a randomized controlled trial
Source: Springer Nature journal article supplement (doi:10.1186/s12936-021-03895-9), 2021-08-31
Supplement: MOESM2 [file 19615684]

# Pour la distribution de Zithromax<sup>®</sup> aux enfants

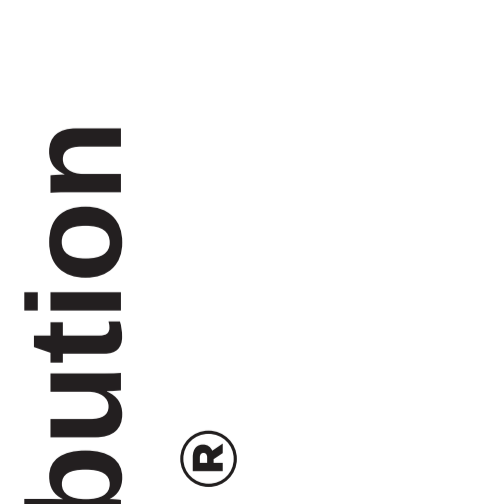

La toise doit être placée verticalement.  
La personne doit se tenir contre la toise  
pour calculer la quantité de traitement  
(en ml) correspondant à sa taille.

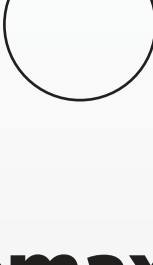

**Zithromax<sup>®</sup> Pole**  
for Burkina Faso

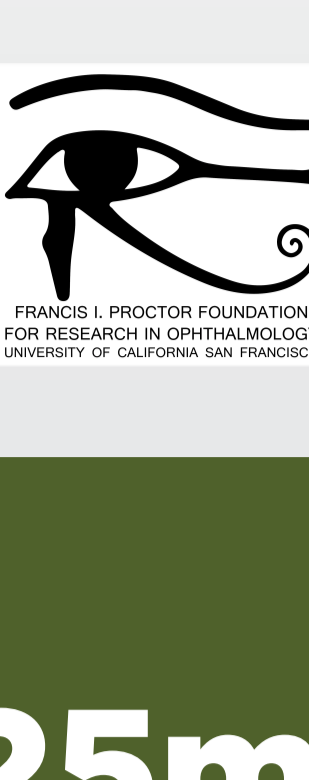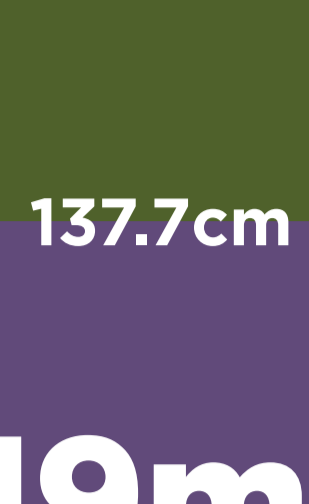

**- 25ml -**

137.7cm

**- 19ml -**

130cm

**- 16ml -**

122.2cm

**- 14ml -**

110.2cm

**- 12ml -**

98.3cm

**- 10ml -**

87.5cm

**- 8ml -**

76.5cm

**- 6ml -**

65.5cm

**- 4ml -**

53.8cm

**- 2ml -**

50.6cm
